# Supplementary material for: Structure-based protein function prediction using graph convolutional networks
Source: PubMed Central journal article supplement (PMC8155034; doi:10.1038/s41467-021-23303-9), 2021-05-26
Supplement: 41467_2021_23303_MOESM2_ESM.pdf [file 41467_2021_23303_MOESM2_ESM.pdf]

## **Description of Additional Supplementary Files**

**Supplementary Data 1:** List of unannotated PDB chains with our predicted functions.

**Supplementary Data 2:** List of unannotated SWISS-MODEL chains with our predicted functions.
